# Supplementary material for: Antischistosomal Properties of Hederacolchiside A1 Isolated from Pulsatilla chinensis
Source: PubMed Central journal article supplement (PMC6099544; doi:10.3390/molecules23061431), 2018-06-13
Supplement: molecules-23-01431-s001.pdf [file molecules-23-01431-s001.pdf]

Supplementary Fig. S1

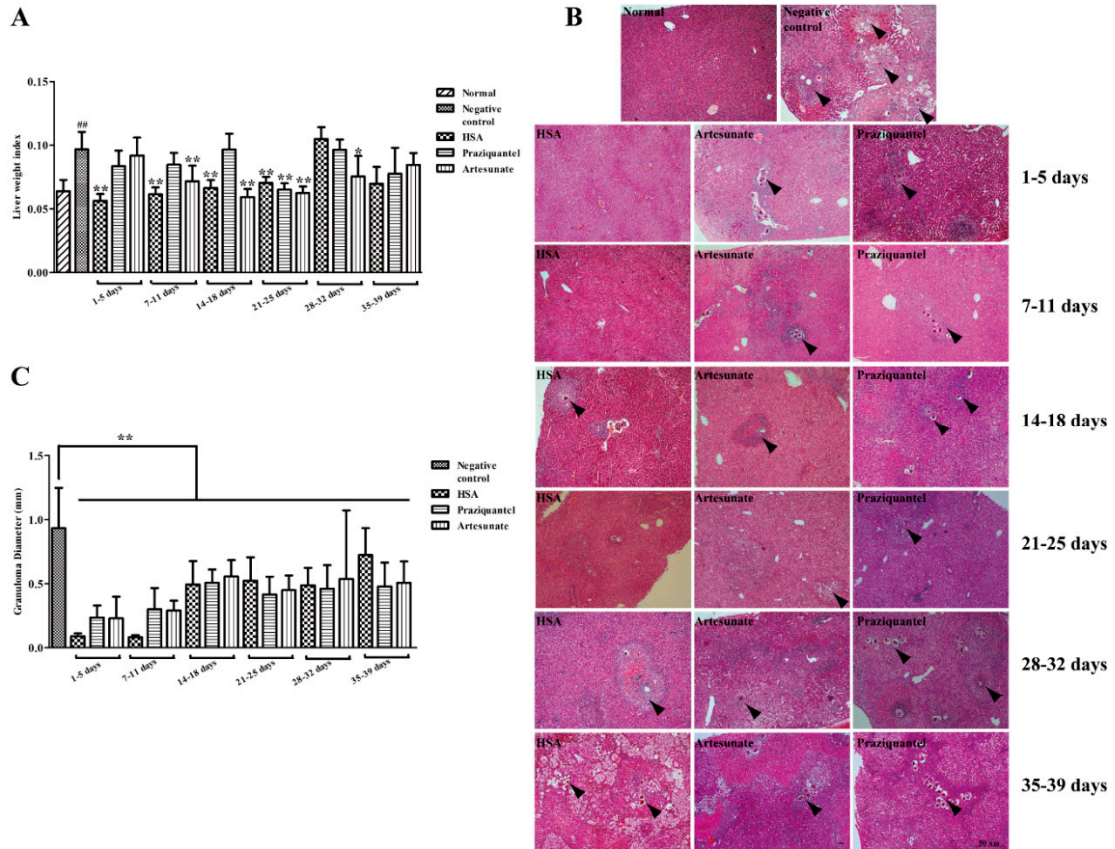

**Figure S1.** Reduction of hepatic granulomatous inflammation by HSA in mice. Mice were treated by intraperitoneal administration of 8 mg·kg<sup>-1</sup> HSA, 300 mg·kg<sup>-1</sup> praziquantel (positive control) and 300 mg·kg<sup>-1</sup> artesunate (positive control) as antischistosomal treatments for *S. japonicum* infection as shown in Materials and Methods. The effect of HSA on hepatic granulomatous inflammation of infected mice was tested. **A.** Liver weight index (liver weight/body weight). Each bar represents the mean ± SD. \**P*<0.05 vs Negative control, T. test; \*\**P*<0.01 vs Negative control, T. test). **B.** Representative hepatic granulomas of 7-week-infected drug-untreated and drug-treated mice. Photographs were taken at 100× (H & E). Black arrows represent the area of granuloma. **C.** Quantification of egg-induced liver pathology by measurement of mean granuloma diameter. Each bar represents the mean ± SD; \*\**P*<0.01 vs Negative control, T. test.
